# Supplementary material for: Unveiling Mental Health Profiles in Emerging Adults and Their Associations with Attachment Insecurity: A person-centered Approach
Source: Springer Nature journal article supplement (doi:10.1007/s10902-025-00917-0), 2025-06-01
Supplement: MOESM1 [file 10902_2025_917_MOESM1_ESM.docx]

| **Table S1** Distribution of Sociodemographic Characteristics by Profile (%) | | | | | |
| --- | --- | --- | --- | --- | --- |
|  | **CMH** | **WA** | **Vulnerable** | **SC** | **Troubled** |
| Women | 45.1 | 61.4 | 55.8 | 75.6 | 76.8 |
| Men | 54.9 | 38.6 | 44.2 | 24.4 | 23.2 |
| Age (mean) | 22.69 | 22.49 | 22.24 | 22.22 | 21.96 |
| **Sexual orientation** |  |  |  |  |  |
| Heterosexual | 83.4 | 68.9 | 60.6 | 62.7 | 54.3 |
| Gay men and lesbians | 2.9 | 5.4 | 6.3 | 6.2 | 5.1 |
| Bisexual | 11.7 | 20.9 | 27.8 | 26.7 | 29.7 |
| Other | 2 | 4.7 | 5.3 | 4.4 | 10.9 |
| **Educational levela** |  |  |  |  |  |
| Basic education | 0.5 | 0.4 | 2.4 | - | - |
| Secondary education | 33.7 | 35.9 | 36.1 | 41.3 | 43.5 |
| Technical education | 6.4 | 5.5 | 7.7 | 5.4 | 7.2 |
| Incomplete HE | 34.5 | 43.5 | 43.3 | 40.0 | 40.6 |
| Complete HE | 24.9 | 14.6 | 10.6 | 13.3 | 8.7 |
| **Romantic relationship** |  |  |  |  |  |
| Yes | 64.7 | 58.5 | 54.8 | 65.8 | 65.9 |
| No | 35.3 | 41.5 | 55.2 | 34.2 | 34.1 |
| **Note.** CMH: Complete mental health; WA: Well-adapted; SC: Symptomatic but content; HE: higher education or postgraduate education | | | | | |
| a This variable was recoded to combine individuals with incomplete basic education and those with complete basic education into one group, while individuals with incomplete and complete college education were grouped together into another category. | | | | | |
